# Supplementary material for: Predicting Progression from Mild Cognitive Impairment to Alzheimer's Dementia Using Clinical, MRI, and Plasma Biomarkers via Probabilistic Pattern Classification
Source: PubMed Central journal article supplement (PMC4762666; doi:10.1371/journal.pone.0138866), 2016-02-22
Supplement: pone.0138866.s001.pdf [file pone.0138866.s001.pdf]

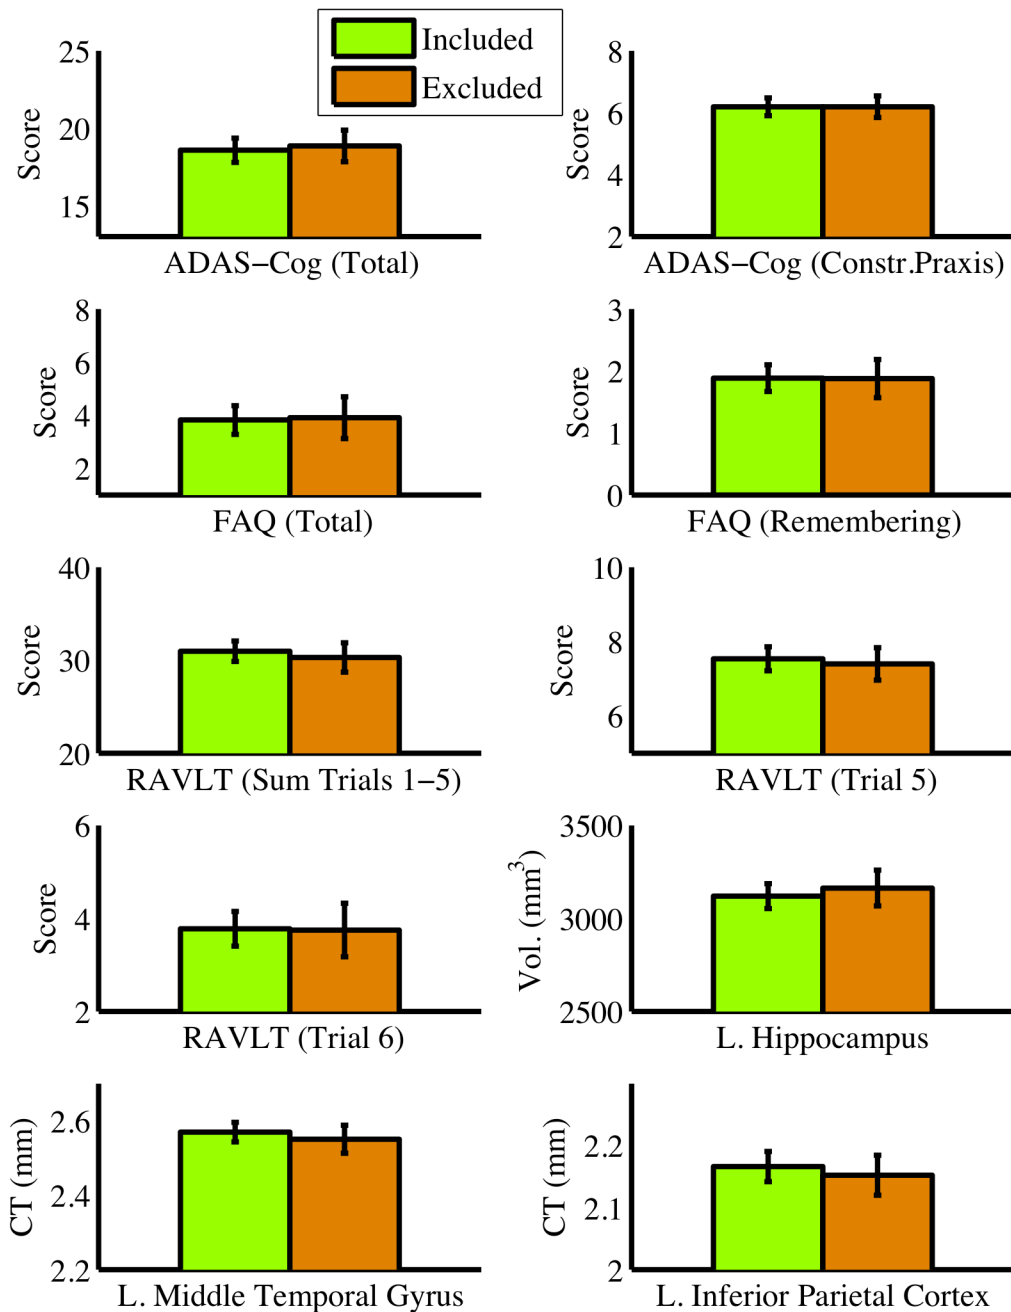

**Figure S1. Comparison between included (n=259) and excluded (n=131) MCI subjects on baseline predictor variables.** Error bars are 95% confidence intervals. No group differences were found for any of the predictor variables (all  $P > 0.4$ ). Vol. = volume, CT = cortical thickness, ADAS-Cog = Alzheimer's Disease Assessment Scale – Cognitive sub-scale, FAQ = Functional Activities Questionnaire, RAVLT = Rey Auditory-Verbal Learning Test, L. = Left, Constr. = Constructional
