# Supplementary material for: Predicting Progression from Mild Cognitive Impairment to Alzheimer's Dementia Using Clinical, MRI, and Plasma Biomarkers via Probabilistic Pattern Classification
Source: PubMed Central journal article supplement (PMC4762666; doi:10.1371/journal.pone.0138866), 2016-02-22
Supplement: pone.0138866.s003.pdf [file pone.0138866.s003.pdf]

| Model (#)                                                                                                                                                                                                                                                                                                                                              | V-BAR (%)  | T-BAR (%)  | Sn (%)      | Sp (%)      | AUC         | CCC         | $D_{OPTIMAL}$ / Total |
|--------------------------------------------------------------------------------------------------------------------------------------------------------------------------------------------------------------------------------------------------------------------------------------------------------------------------------------------------------|------------|------------|-------------|-------------|-------------|-------------|-----------------------|
| CONCAT (5)                                                                                                                                                                                                                                                                                                                                             | 79.7 ± 1.4 | 80.0 ± 7.3 | 80.3 ± 10.6 | 79.8 ± 10.9 | 0.86 ± 0.07 | 0.93 ± 0.02 | 10 ± 3 / 787          |
| MKL-Gaussian (6)                                                                                                                                                                                                                                                                                                                                       | 80.3 ± 1.3 | 79.9 ± 6.8 | 83.4 ± 9.9  | 76.4 ± 12.3 | 0.87 ± 0.07 | 0.95 ± 0.01 | 10 ± 3 / 787          |
| MKL-LPG (7)                                                                                                                                                                                                                                                                                                                                            | 80.2 ± 1.5 | 79.7 ± 7.2 | 81.0 ± 9.8  | 78.3 ± 12.3 | 0.87 ± 0.07 | 0.94 ± 0.02 | 10 ± 0 / 787          |
| MKL-Poly (8)                                                                                                                                                                                                                                                                                                                                           | 80.1 ± 1.4 | 79.5 ± 7.5 | 82.2 ± 10.2 | 76.8 ± 12.4 | 0.87 ± 0.07 | 0.94 ± 0.02 | 10 ± 3 / 787          |
| MKL-Linear (9)                                                                                                                                                                                                                                                                                                                                         | ##         | 74.9 ± 6.7 | 74.6 ± 11.7 | 75.2 ± 11.9 | 0.84 ± 0.07 | 0.88 ± 0.04 | 74 ± 18 / 787         |
| V-BAR and T-BAR = Validation Set and Test Set Balanced Accuracy Rate, Sn = Sensitivity, Sp = Specificity, AUC = Area under the Curve from Receiver Operating Characteristic analysis, CCC = Concordance Correlation Coefficient, $D_{OPTIMAL}$ = optimal number of features                                                                            |            |            |             |             |             |             |                       |
| Model 5 (CONCAT): single linear kernel, concatenating features from all data sources.                                                                                                                                                                                                                                                                  |            |            |             |             |             |             |                       |
| Model 6 (MKL-Gaussian): 5 Gaussian kernels using features from all data sources.                                                                                                                                                                                                                                                                       |            |            |             |             |             |             |                       |
| Model 7 (MKL-LPG): 3 kernels (linear, polynomial, Gaussian) using features from all data sources.                                                                                                                                                                                                                                                      |            |            |             |             |             |             |                       |
| Model 8 (MKL-Poly): 5 polynomial kernels using features from all data sources.                                                                                                                                                                                                                                                                         |            |            |             |             |             |             |                       |
| Model 9 (MKL-Linear): 4 linear kernels, each encoding the most informative features for one of the four data sources (CRF, CAM, MRI, PPM), as determined in single-source models 1-4. ## Since no inner CV was necessary other than what was done in models 1-4 to determine the optimal feature subset size, V-BAR was not calculated for this model. |            |            |             |             |             |             |                       |

**Table S1. Cross-validated performance estimates for single-kernel (5) and multiple-kernel (6-9) multi-source models.** In terms of classification accuracy (T-BAR), the CONCAT model performed similarly to MKL-LPG, MKL-Poly, and MKL-Gaussian models (all  $P > 0.3$ , paired-sample  $t$ -test) and outperformed the MKL-Linear model ( $P < 0.001$ ). While MKL-LPG and MKL-Poly models were as equally well-calibrated as the CONCAT model (as indicated by the CCC; both  $P > 0.2$ ), the MKL-Linear model was less well calibrated ( $P < 0.01$ ) and the MKL-Gaussian model was better calibrated ( $P < 0.05$ ) than the CONCAT model.
